# Supplementary material
Source: PubMed Central journal article supplement (PMC2878206)
Supplement: NIHMS187008-supplement-1_si_001.pdf [file NIHMS187008-supplement-1_si_001.pdf]

## **Supporting Information**

**for**

### **Copper/ $\alpha$ -Ketocarboxylate Chemistry With Supporting Peralkylated Diamines: Reactivity of Copper(I) Complexes and Dicopper-Oxygen Intermediates**

Aalo K. Gupta and William B. Tolman\*

*Department of Chemistry and Center for Metals in Biocatalysis, University of Minnesota, 207 Pleasant St. SE, Minneapolis, MN 55455. E-mail: wtolman@umn.edu.*

## Contents

**Table S1.** X-ray crystallographic parameters for (tBu<sub>2</sub>Me<sub>2</sub>eda)Cu(BF), (tBu<sub>2</sub>Me<sub>2</sub>eda)Cu(*p*-nitro-BF), and (Me<sub>4</sub>pda)CuBF<sub>2</sub>.

**Figure S1.** UV-vis spectral data for the reaction of (tBu<sub>2</sub>Me<sub>2</sub>eda)Cu(nitro-BF) in CH<sub>2</sub>Cl<sub>2</sub> (0.67 mM) with O<sub>2</sub> at -80 °C

**Figure S2.** Variable temperature <sup>1</sup>H-NMR spectra of (tBu<sub>2</sub>Me<sub>2</sub>eda)Cu(BF).

**Figure S3.** Variable temperature <sup>1</sup>H-NMR spectra of (tBu<sub>2</sub>Me<sub>2</sub>eda)Cu(nitro-BF).

**Figure S4.** Expansion of the <sup>1</sup>H NMR features at ~2.06 and ~3.06 ppm for (tBu<sub>2</sub>Me<sub>2</sub>eda)Cu(BF) in CD<sub>2</sub>Cl<sub>2</sub> at -60 °C.

**Figure S5.** FTIR spectra of solid samples of Bu<sub>4</sub>NBA, Bu<sub>4</sub>NBF, and nitro-BF.

**Figure S6.** FTIR spectra of solid and solution sample of (tBu<sub>2</sub>Me<sub>2</sub>eda)Cu(BF).

**Figure S7.** FTIR spectra of solid and solution sample of (tBu<sub>2</sub>Me<sub>2</sub>eda)Cu(nitro-BF).

**Figure S8.** FTIR spectra of solid and solution sample of (Me<sub>4</sub>pda)Cu(BF)<sub>2</sub>.

**Figure S9.** Variable temperature <sup>1</sup>H-NMR spectra of (tBu<sub>2</sub>Me<sub>2</sub>eda)Cu(BF) in CD<sub>2</sub>Cl<sub>2</sub> with 5 equivalents of cyclohexene.

**Figure S10.** Variable temperature <sup>1</sup>H-NMR spectra of (tBu<sub>2</sub>Me<sub>2</sub>eda)Cu(nitro-BF) in CD<sub>2</sub>Cl<sub>2</sub> with 5 equivalents of cyclohexene.

**Figure S11.** Results from the global fitting analysis of the reaction [(Me<sub>4</sub>pda)<sub>2</sub>Cu<sub>2</sub>O<sub>2</sub>]OTf<sub>2</sub> + 60 equivalents Bu<sub>4</sub>NBF.

**Table S1.** X-ray crystallographic parameters for (tBu<sub>2</sub>Me<sub>2</sub>eda)Cu(BF), (tBu<sub>2</sub>Me<sub>2</sub>eda)Cu(*p*-nitro-BF), and (Me<sub>4</sub>pda)CuBF<sub>2</sub>. For a complete description, see the CIF.

|                                         | (tBu <sub>2</sub> Me <sub>2</sub> eda)Cu(BF)                    | (tBu <sub>2</sub> Me <sub>2</sub> eda)Cu( <i>p</i> -nitro-BF)   | (Me <sub>4</sub> pda)CuBF <sub>2</sub>                          |
|-----------------------------------------|-----------------------------------------------------------------|-----------------------------------------------------------------|-----------------------------------------------------------------|
| Empirical formula                       | C <sub>20</sub> H <sub>33</sub> CuN <sub>2</sub> O <sub>3</sub> | C <sub>20</sub> H <sub>32</sub> CuN <sub>3</sub> O <sub>5</sub> | C <sub>23</sub> H <sub>28</sub> CuN <sub>2</sub> O <sub>6</sub> |
| Formula weight                          | 413.02                                                          | 458.03                                                          | 492.01                                                          |
| Crystal system                          | Monoclinic                                                      | Monoclinic                                                      | Triclinic                                                       |
| Space group                             | P <sub>21</sub>                                                 | P <sub>21/c</sub>                                               | P <sub>-1</sub>                                                 |
| <i>a</i> (Å)                            | 9.7882(6)                                                       | 19.2670(13)                                                     | 8.076(5)                                                        |
| <i>b</i> (Å)                            | 10.3914(6)                                                      | 8.9816(6)                                                       | 11.998(5)                                                       |
| <i>c</i> (Å)                            | 10.3951(7)                                                      | 13.6990(9)                                                      | 12.092(5)                                                       |
| α (deg)                                 | 90                                                              | 90                                                              | 86.948(5)                                                       |
| β (deg)                                 | 97.540(2)                                                       | 107.274(2)                                                      | 81.838(5)                                                       |
| γ (deg)                                 | 90                                                              | 90                                                              | 76.588(5)                                                       |
| Volume (Å <sup>3</sup> )                | 1048.18(11)                                                     | 2263.7(3)                                                       | 1127.9(10)                                                      |
| <i>Z</i>                                | 2                                                               | 4                                                               | 2                                                               |
| T(K)                                    | 173(2)                                                          | 173(2)                                                          | 173(2)                                                          |
| ρ (calculated) (Mg/m <sup>3</sup> )     | 1.309                                                           | 1.347                                                           | 1.449                                                           |
| θ range (deg)                           | 1.98 to 25.06                                                   | 1.11 to 25.07                                                   | 1.7 to 25.06                                                    |
| μ (mm <sup>-1</sup> )                   | 1.062                                                           | 0.999                                                           | 1.010                                                           |
| Reflections collected                   | 10469                                                           | 21392                                                           | 10940                                                           |
| Independent reflections                 | 3708                                                            | 4019                                                            | 4007                                                            |
| parameters                              | 244                                                             | 313                                                             | 293                                                             |
| R1, wR2 (for <i>I</i> > 2σ( <i>I</i> )) | 0.0249, 0.0598                                                  | 0.0660, 0.1425                                                  | 0.0355, 0.0844                                                  |
| GOF                                     | 1.006                                                           | 1.037                                                           | 0.985                                                           |
| Largest Peak, Hole (e.Å <sup>-3</sup> ) | 0.307 and -0.181                                                | 1.917 and -1.754                                                | 0.424 and -0.382                                                |
| <i>F</i> (000)                          | 440                                                             | 972                                                             | 514                                                             |
| Crystal color, morphology               | yellow, plate                                                   | gold, plate                                                     | green, block                                                    |
| Crystal size                            | 0.50 x 0.40 x 0.10 mm <sup>3</sup>                              | 0.50 x 0.40 x 0.10                                              | 0.4 x 0.3 x 0.2                                                 |
| Index ranges                            | -11 ≤ <i>h</i> ≤ 11, -12 ≤ <i>k</i> ≤ 12, -12 ≤ <i>l</i> ≤ 12   | -22 ≤ <i>h</i> ≤ 22, -10 ≤ <i>k</i> ≤ 10, -16 ≤ <i>l</i> ≤ 16   | -9 ≤ <i>h</i> ≤ 9, -14 ≤ <i>k</i> ≤ 14, -14 ≤ <i>l</i> ≤ 14     |

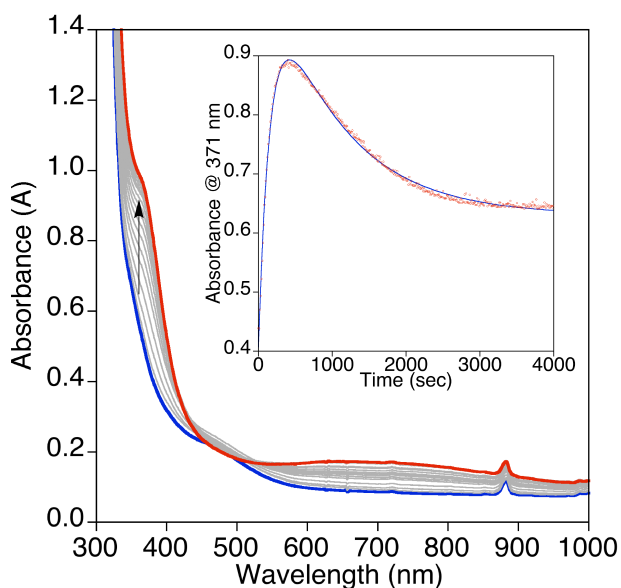

**Figure S1.** UV-vis spectral data for the reaction of (tBu<sub>2</sub>Me<sub>2</sub>eda)Cu(nitro-BF) in CH<sub>2</sub>Cl<sub>2</sub> (0.67 mM) (*blue*) with O<sub>2</sub> at -80 °C with spectra shown every 20 sec (spectrum for the intermediate shown in *red*). The inset displays the time trace for the formation and decay of the intermediate data monitored at 375 nm (*red dots*) and fit to a bi-exponential equation [ $A_t = A1 - A2*\exp(-k_1*t) + A3*\exp(-k_2*t)$ ,  $k_1 = 0.0062 \text{ s}^{-1}$  and  $k_2 = 0.0010 \text{ s}^{-1}$ ;  $R = 0.998$ ].

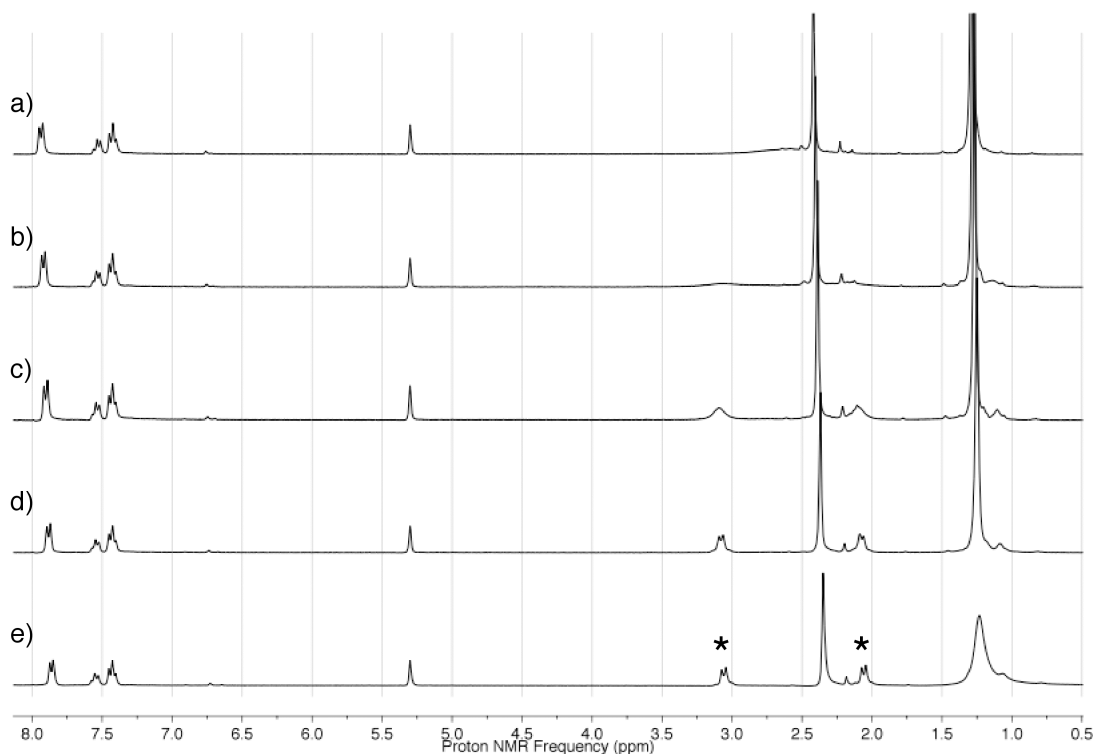

**Figure S2.** Variable temperature <sup>1</sup>H NMR spectra of (tBu<sub>2</sub>Me<sub>2</sub>eda)Cu(BF) in CD<sub>2</sub>Cl<sub>2</sub> at a) Room temperature; b) 0 °C; c) -20 °C; d) -40 °C; e) -60 °C. The new features observed at -60 °C and modeled in Figures S3 and S4 are marked with asterisks.

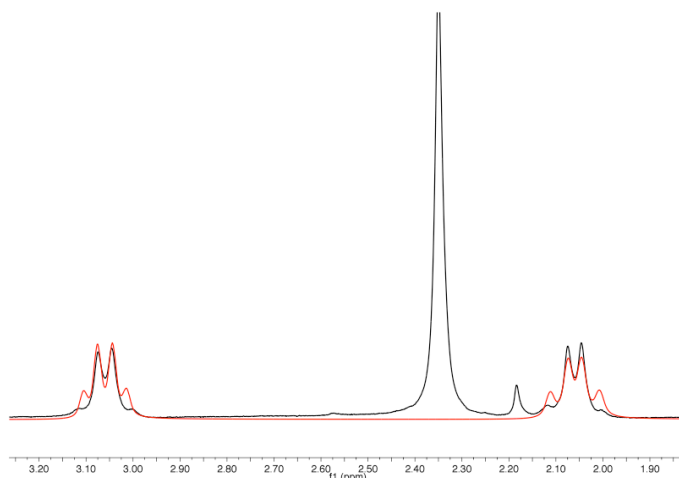

**Figure S3.** Expansion of the  $^1\text{H}$  NMR features at  $\sim 2.06$  and  $\sim 3.06$  ppm for  $(\text{tBu}_2\text{Me}_2\text{eda})\text{Cu}(\text{BF})$  in  $\text{CD}_2\text{Cl}_2$  at  $-60$  °C (*black*) with a simulated spectrum overlaid (*red*). The simulated spectrum was generated with 4 spins (A, B, C, and D) with A = 2.09 ppm, B = 2.03 ppm, C = 3.09 ppm, and D = 3.03 ppm and  $J_{\text{AB}} = J_{\text{CD}} = 15$  Hz,  $J_{\text{AC}} = J_{\text{AD}} = J_{\text{BC}} = J_{\text{BD}} = 3$  Hz using MestReNova v6.0.2 NMR processing software.

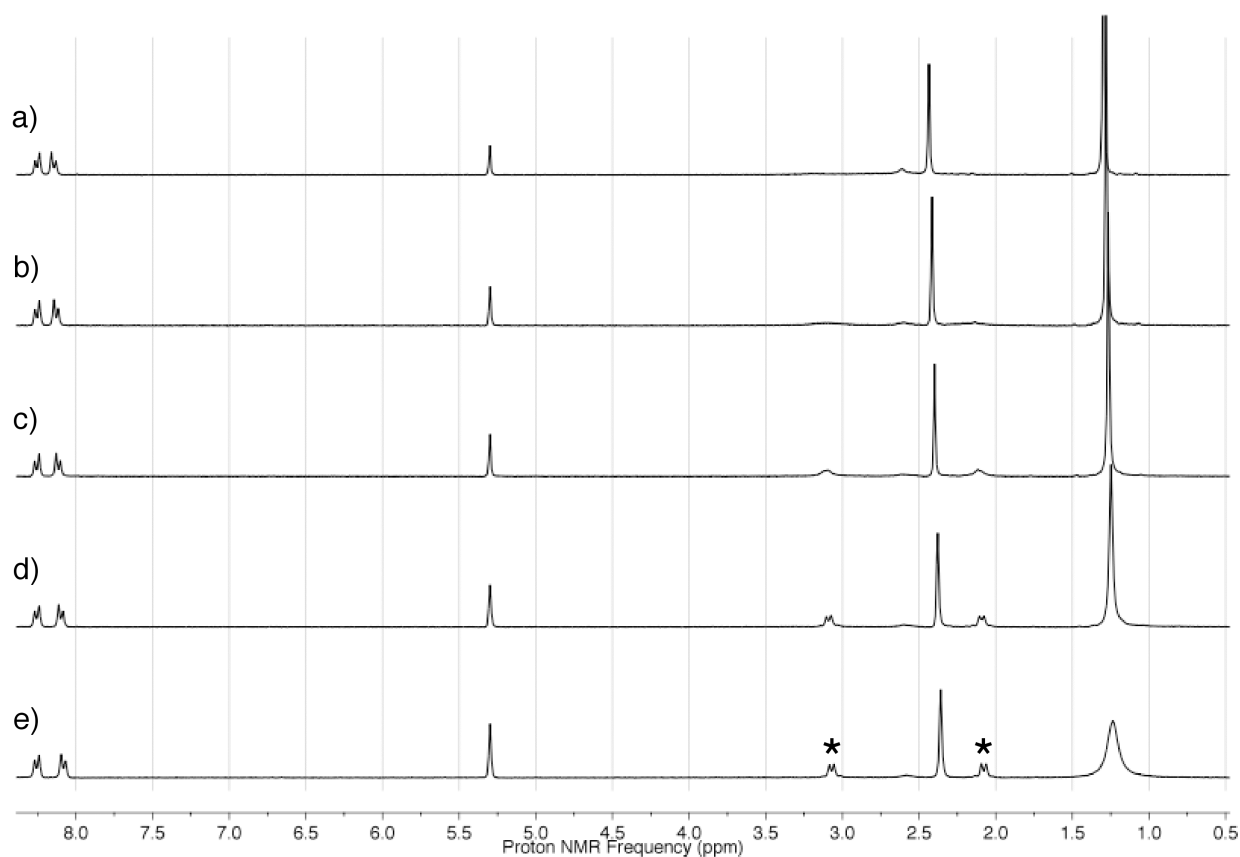

**Figure S4.** Variable temperature  $^1\text{H}$  NMR spectra of  $(\text{tBu}_2\text{Me}_2\text{eda})\text{Cu}(\text{nitro-BF})$  in  $\text{CD}_2\text{Cl}_2$  at a) Room temperature; b)  $0$  °C; c)  $-20$  °C; d)  $-40$  °C; e)  $-60$  °C. The new features observed at  $-60$  °C are marked with asterisks.

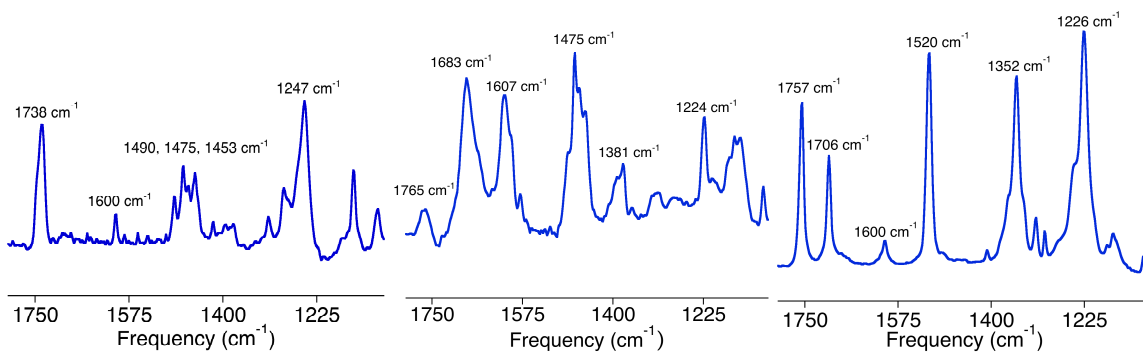

**Figure S5.** FTIR spectra of solid samples of Bu<sub>4</sub>NBA (*left*), Bu<sub>4</sub>NBF (*center*), and nitro-BF (free acid) (*right*).

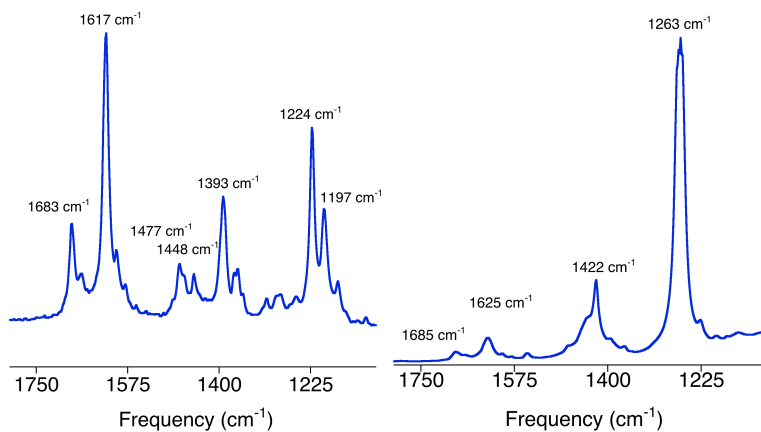

**Figure S6.** FTIR spectra of solid sample of (tBu<sub>2</sub>Me<sub>2</sub>eda)Cu(BF) (*left*) and solution sample of (tBu<sub>2</sub>Me<sub>2</sub>eda)Cu(BF) (10 mM in CH<sub>2</sub>Cl<sub>2</sub>) (*right*).

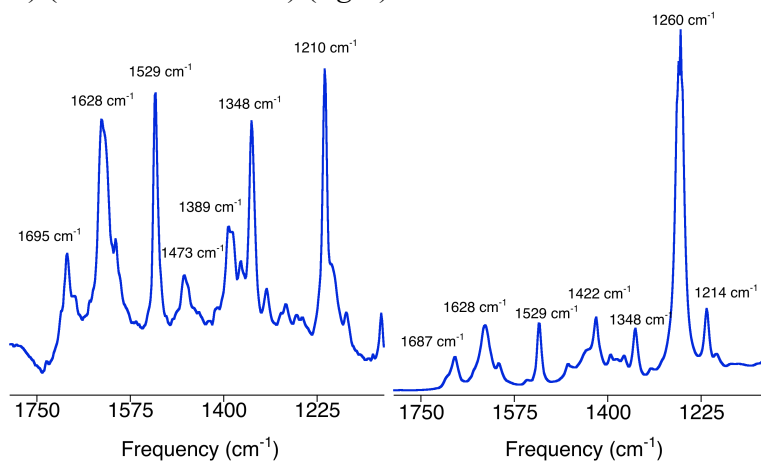

**Figure S7.** FTIR spectra of solid sample of (tBu<sub>2</sub>Me<sub>2</sub>eda)Cu(nitro-BF) (*left*) and solution sample of (tBu<sub>2</sub>Me<sub>2</sub>eda)Cu(nitro-BF) (10 mM in CH<sub>2</sub>Cl<sub>2</sub>) (*right*).

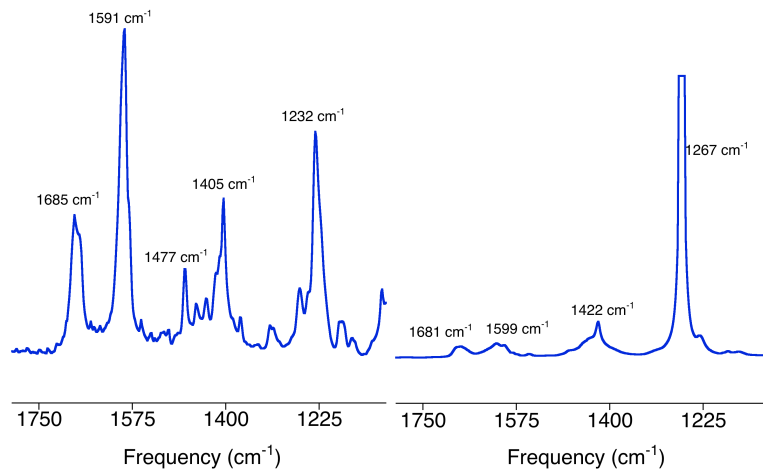

**Figure S8.** FTIR spectra of solid sample of  $(\text{Me}_4\text{pda})\text{Cu}(\text{BF})_2$  (*left*) and solution sample of  $(\text{Me}_4\text{pda})\text{Cu}(\text{BF})_2$  (10 mM in  $\text{CH}_2\text{Cl}_2$ ) (*right*).

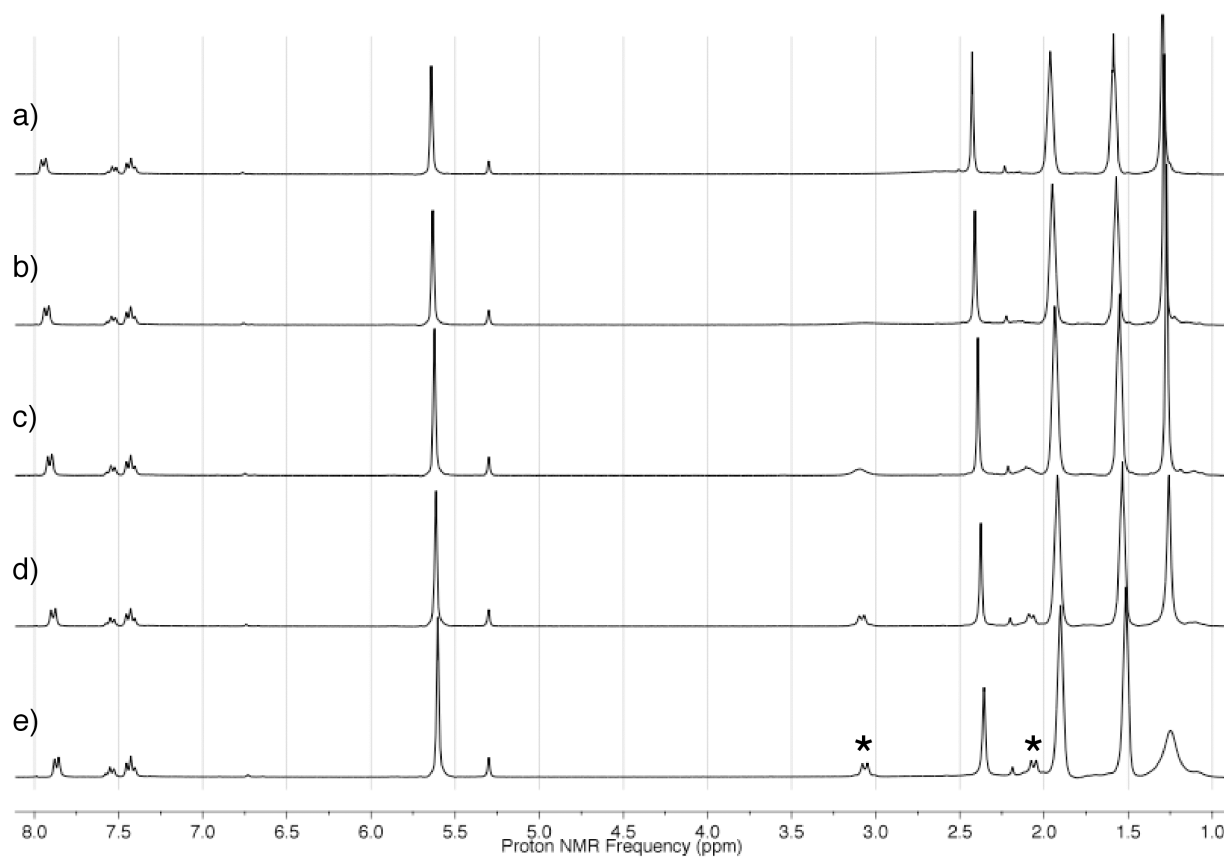

**Figure S9.** Variable temperature  $^1\text{H}$ -NMR spectra of  $(\text{tBu}_2\text{Me}_2\text{eda})\text{Cu}(\text{BF})$  in  $\text{CD}_2\text{Cl}_2$  with 5 equivalents of cyclohexene at a) Room temperature; b)  $0\text{ }^\circ\text{C}$ ; c)  $-20\text{ }^\circ\text{C}$ ; d)  $-40\text{ }^\circ\text{C}$ ; e)  $-60\text{ }^\circ\text{C}$ . New features observed at  $-60\text{ }^\circ\text{C}$  are marked with asterisks.

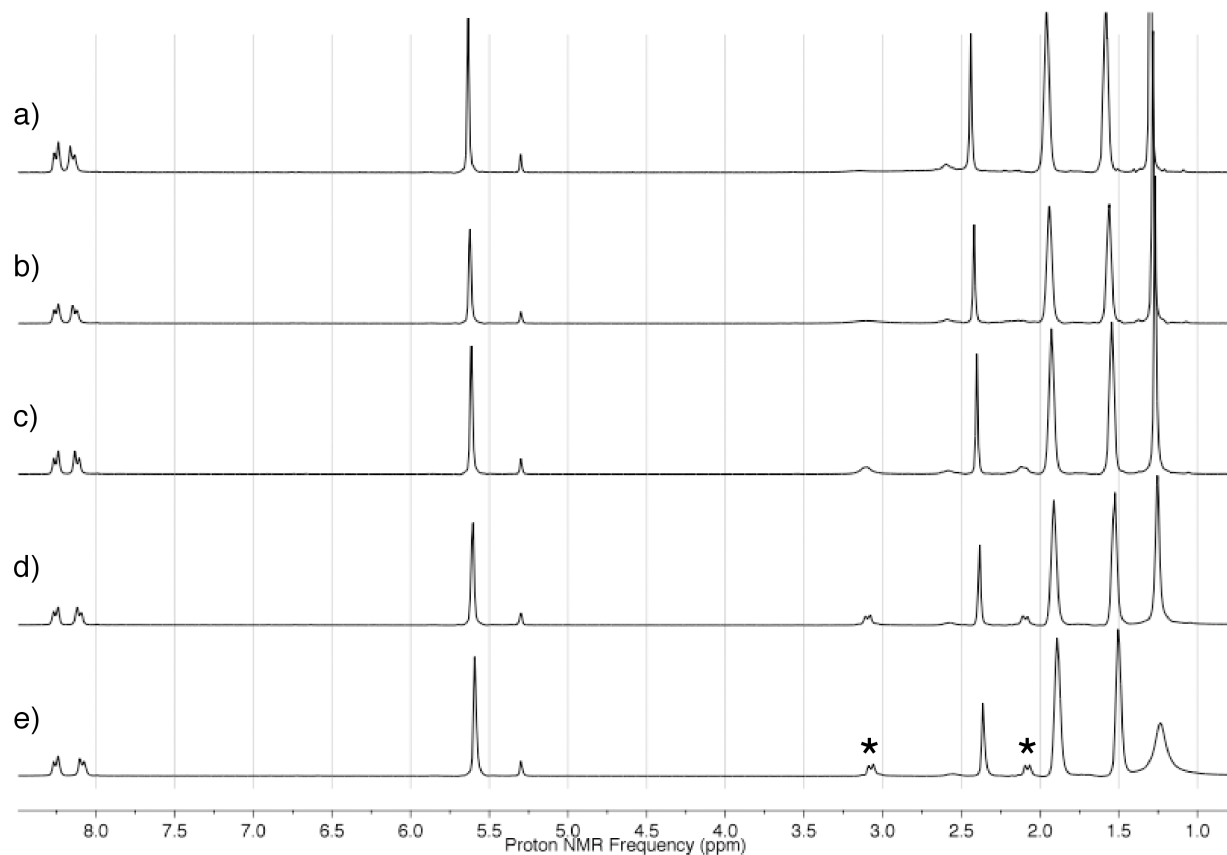

**Figure S10.** Variable temperature <sup>1</sup>H-NMR spectra of (tBu<sub>2</sub>Me<sub>2</sub>eda)Cu(nitro-BF) in CD<sub>2</sub>Cl<sub>2</sub> with 5 equivalents of cyclohexene at a) Room temperature; b) 0 °C; c) -20 °C; d) -40 °C; e) -60 °C. New features observed at -60 °C are marked with asterisks.



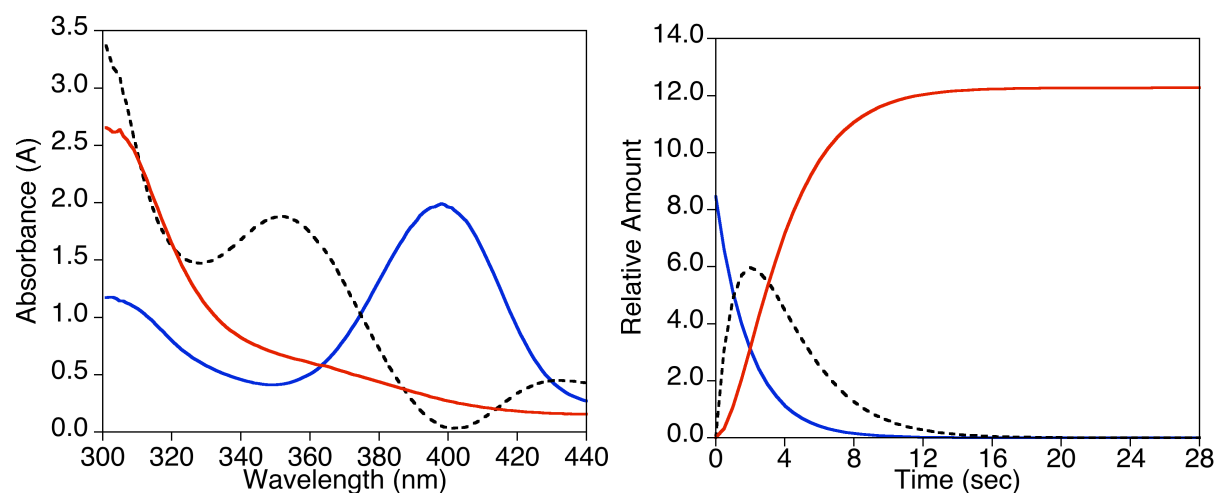

**Figure S11.** Results from the global fitting analysis of the UV-vis spectra obtained during the reaction of  $[(\text{Me}_4\text{pda})_2\text{Cu}_2\text{O}_2]\text{OTf}_2$  in  $\text{CH}_2\text{Cl}_2$  (0.1 mM) at  $-80^\circ\text{C}$  (blue) with 60 equivalents  $\text{Bu}_4\text{NBF}_4$ . Data was truncated to a region between 300-440 nm to only include areas of significant spectral change followed by singular value decomposition (SVD) factor analysis using Olis GlobalWorks<sup>TM</sup>. Three kinetic species were chosen from the significant eigenvectors resulting from the SVD process and are shown (left). The data were fit to an  $\text{A}(\text{blue}) \rightarrow \text{B}(\text{dashed line}) \rightarrow \text{C}(\text{red})$  model with the relative amounts of intermediate species with respect to time shown (right). Each step was treated as a first order reaction with the following rate constants  $k_1 = 5.1 \times 10^{-1} \text{ s}^{-1}$  and  $k_2 = 5.1 \times 10^{-1} \text{ s}^{-1}$ .
